# Supplementary material for: Construction of high-performance electrode materials of NiCo2O4 nanoparticles encapsulated in ultrathin N-doped carbon nanosheets for supercapacitors
Source: Royal Society of Chemistry journal article supplement (doi:10.1039/d0dt04011h), 2020-12-24
Supplement: d0dt04011h1.pdf [file d0dt04011h1.pdf]

# **Constructed high-performance electrode material of NiCo<sub>2</sub>O<sub>4</sub> Nanoparticles Encapsulated in Ultrathin N-doped Carbon Nanosheets for Supercapacitor**

Yaju Zhou<sup>a b†</sup>, Chunyan Li<sup>d†</sup>, Xin Li<sup>a</sup>, Pengwei Huo<sup>a\*</sup>, Huiqin Wang<sup>d\*</sup>,

<sup>a</sup> *Institute of Green Chemistry and Chemical Technology, School of Chemistry & Chemical Engineering, Jiangsu University, Zhenjiang 212013, PR China*

<sup>b</sup> *State Key Laboratory of Materials Processing and Die & Mould Technology, Department of Materials Science and Engineering, Huazhong University of Science and Technology, Wuhan 430074, PR China*

<sup>c</sup> *School of energy and power engineering, Jiangsu University, Zhenjiang 212013, PR China*

<sup>d</sup> *Jiangsu Fluid Machinery Engineering Research Center, Jiangsu University, Zhenjiang 212013, PR China*

---

\*Correspondence: Pengwei Huo [huopw@mail.ujs.edu.cn](mailto:huopw@mail.ujs.edu.cn), Huiqin Wang [hqwang@mail.ujs.edu.cn](mailto:hqwang@mail.ujs.edu.cn)

†These authors have contributed equally to this work

Fig. s1 (a) describes the CV curves of  $\text{NiCo}_2\text{O}_4$  at different scanning rates of 10, 20, 40, 50 and 100  $\text{mV s}^{-1}$ . With the increase of scanning rate, the oxidation peak moves to a higher potential, while the reduction peak moves to a lower potential, which is due to the limitation of ion diffusion rate in electron neutralization during redox reaction. Each curve shows a pair of redox peaks, which originate from Faraday redox reaction and relate to the surface reversible redox reaction. Most importantly,  $\text{NiCo}_2\text{O}_4$  composite electrode is similar and almost does not deform, indicating that the composite electrode has good conductivity. Fig. s1 (b) shows the GCD curves of the N-C/ $\text{NiCo}_2\text{O}_4$  composite electrode at the current rates of 1, 2, 3, 4 and 5  $\text{A g}^{-1}$ . The equivalent substitution shows low energy and high specific capacity, and the equivalent doping  $\text{Ni}^{2+}$  site charge concentration of olivine structure does not change.

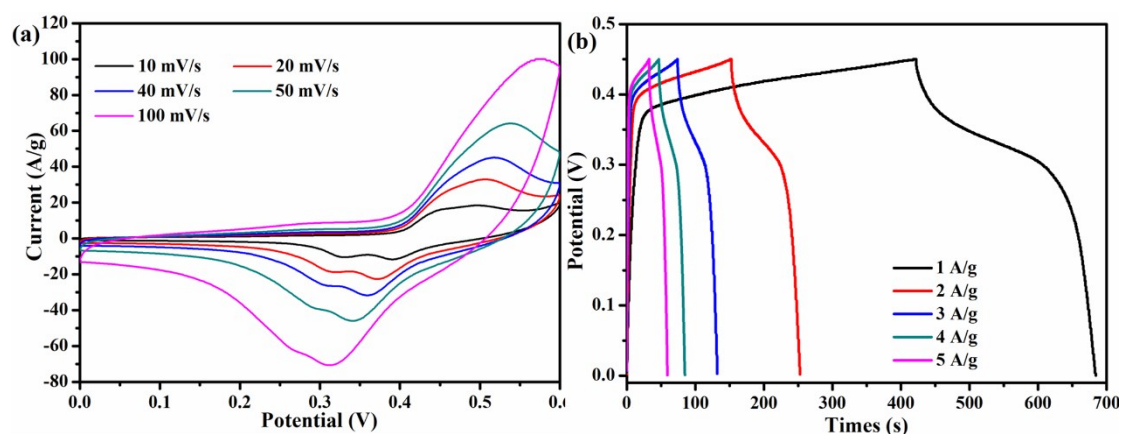

Fig. s1 (a) CV and (b) GCD curves of  $\text{NiCo}_2\text{O}_4$  at different scan rates and different current density.

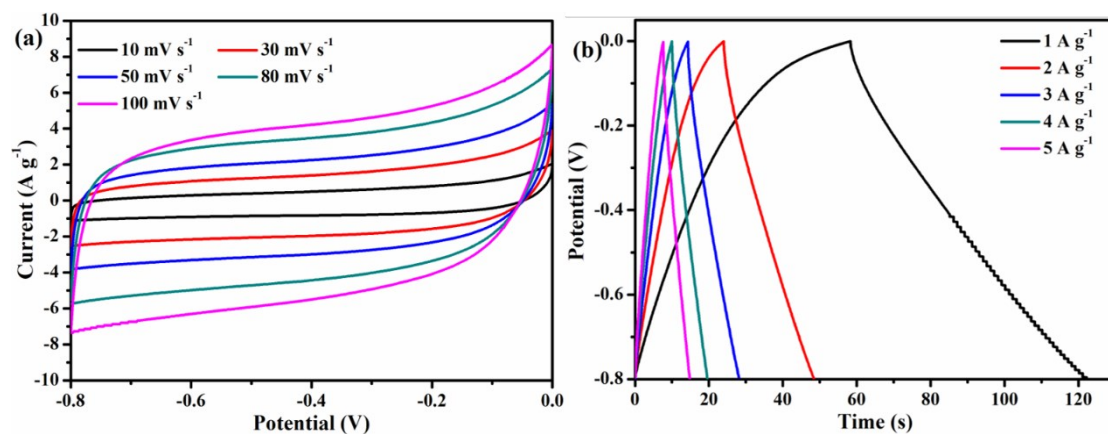

Fig. s2 (a) CV and GCD curves of AC at different scan rates and different current density.
